# Supplementary material for: Acute and Chronic Changes in Gene Expression After CMV DNAemia in Kidney Transplant Recipients
Source: Front Immunol. 2021 Nov 15;12:750659. doi: 10.3389/fimmu.2021.750659 (PMC8634678; doi:10.3389/fimmu.2021.750659)
Supplement: Supplementary file 2 [file Table_2.xlsx]

## Sheet: PCR+ Base vs Wk1
Ingenuity Canonical Pathways	-log(p-value)	z-score
Oxidative Phosphorylation	13.7	3.27965
EIF2 Signaling	9.57	3.15682
Cyclins and Cell Cycle Regulation	2.18	2.88675
Interferon Signaling	6.1	2.84019
Cytotoxic T Lymphocyte-mediated Apoptosis of Target Cells	3.06	2.82843
Type I Diabetes Mellitus Signaling	2.46	2.67261
Tumoricidal Function of Hepatic Natural Killer Cells	2.1	2.64575
CCR5 Signaling in Macrophages	1.3	2.33333
Actin Nucleation by ARP-WASP Complex	2.51	2.3094
Mitotic Roles of Polo-Like Kinase	5.94	2.11058
Induction of Apoptosis by HIV1	1.39	2.11058
Endocannabinoid Cancer Inhibition Pathway	1.55	2.04124
STAT3 Pathway	2.49	-2.18282
Opioid Signaling Pathway	1.62	-2.1974
FAT10 Cancer Signaling Pathway	1.42	-2.33333
D-myo-inositol (1,4,5)-Trisphosphate Biosynthesis	1.31	-2.44949
CD27 Signaling in Lymphocytes	1.42	-2.52982
Wnt/Ca+ pathway	2.09	-3.05085

## Sheet: PCR+ Base vs Mo1
Ingenuity Canonical Pathways	-log(p-value)	z-score
Oxidative Phosphorylation	15	2.59554
EIF2 Signaling	9.84	2.78543
Coronavirus Pathogenesis Pathway	3.55	-2.6
Antiproliferative Role of TOB in T Cell Signaling	2	-2.12132
Calcium-induced T Lymphocyte Apoptosis	1.87	2.33333
AMPK Signaling	1.51	-2.35702

## Sheet: PCR+ Base vs Long
Ingenuity Canonical Pathways	-log(p-value)	z-score
Communication between Innate and Adaptive Immune Cells	2.39	NA
Sphingosine-1-phosphate Signaling	2.16	NA
Renin-Angiotensin Signaling	2.13	NA
Pathogenesis of Multiple Sclerosis	2.05	NA
Granulocyte Adhesion and Diapedesis	1.86	NA
Hepatic Fibrosis / Hepatic Stellate Cell Activation	1.83	NA
Agranulocyte Adhesion and Diapedesis	1.81	NA
Adrenomedullin signaling pathway	1.75	NA
Differential Regulation of Cytokine Production in Macrophages and T Helper Cells by IL-17A and IL-17F	1.75	NA
Granzyme A Signaling	1.7	NA
Actin Cytoskeleton Signaling	1.66	NA
Differential Regulation of Cytokine Production in Intestinal Epithelial Cells by IL-17A and IL-17F	1.64	NA
IL-17A Signaling in Gastric Cells	1.61	NA
Role of Macrophages, Fibroblasts and Endothelial Cells in Rheumatoid Arthritis	1.39	NA
Role of Hypercytokinemia/hyperchemokinemia in the Pathogenesis of Influenza	1.38	NA
Serotonin Receptor Signaling	1.38	NA
Hematopoiesis from Pluripotent Stem Cells	1.32	NA
Primary Immunodeficiency Signaling	1.31	NA

## Sheet: PCR+ vs PCR- at Long
Ingenuity Canonical Pathways	-log(p-value)	z-score
Fcγ Receptor-mediated Phagocytosis in Macrophages and Monocytes	7.84	3.83761
Interferon Signaling	6.22	3.4641
Remodeling of Epithelial Adherens Junctions	5.68	2.64575
Regulation of Actin-based Motility by Rho	5.4	3.5
Integrin Signaling	4.71	2.50185
IL-8 Signaling	3.71	3.67423
Actin Cytoskeleton Signaling	3.58	2.88675
Leukocyte Extravasation Signaling	3.41	2.2
RhoGDI Signaling	3.15	-2.06474
Ephrin Receptor Signaling	3.08	4.02492
Signaling by Rho Family GTPases	2.97	3.26599
Pentose Phosphate Pathway	2.54	2
Actin Nucleation by ARP-WASP Complex	2.48	2.33333
RhoA Signaling	2.21	3.35659
fMLP Signaling in Neutrophils	2.02	2.88675
Production of Nitric Oxide and Reactive Oxygen Species in Macrophages	1.89	2.52357
Cdc42 Signaling	1.68	2.84019
ILK Signaling	1.34	3.15296
iNOS Signaling	1.31	2.44949
STAT3 Pathway	1.3	2.82843
GM-CSF Signaling	1.3	2.12132
